# Supplementary material for: Clinical and Analytical Evaluation of the Alinity m HR HPV Assay within the VALGENT-3 Framework
Source: PubMed Central journal article supplement (PMC8316144; doi:10.1128/jcm.00286-21), 2021-05-19
Supplement: jcm.00286-21_suppl1.pdf [file jcm.00286-21_suppl1.pdf]

**TABLE S1** Relative sensitivity and specificity of Alinity m compared to (i) HC2, (ii) RealTime, and (iii) cobas in the total study population and in women 30 years or older.

| <b>Alinity m vs. HC2</b>      | <b>Outcome</b> | <b>Relative sensitivity</b> | <b>Relative specificity</b> | $p_{McN}^a$ | $p_{Ni}^b$ |
|-------------------------------|----------------|-----------------------------|-----------------------------|-------------|------------|
| Total study population        | CIN2+          | 1.02 (0.99–1.06)            |                             | 0.3750      | < 0.0001   |
|                               | CIN3+          | 1.03 (0.99–1.06)            |                             | 0.5000      | 0.0006     |
|                               | ≤ CIN1         |                             | 1.01 (1.00–1.02)            | 0.0578      | < 0.0001   |
| Women ≥ 30 years              | CIN2+          | 1.03 (0.99–1.08)            |                             | 0.3750      | 0.001      |
|                               | CIN3+          | 1.03 (0.99–1.08)            |                             | 0.5000      | 0.001      |
|                               | ≤ CIN1         |                             | 1.01 (1.00–1.02)            | 0.0555      | < 0.0001   |
| <b>Alinity m vs. RealTime</b> |                |                             |                             |             |            |
| Total study population        | CIN2+          | 1.02 (0.99–1.04)            |                             | 0.5000      | < 0.0001   |
|                               | CIN3+          | 1.01(0.99–1.04)             |                             | 1.000       | 0.001      |
|                               | ≤ CIN1         |                             | 0.99 (0.98–1.00)            | 0.0736      | 0.005      |
| Women ≥ 30 years              | CIN2+          | 1.02 (0.99–1.05)            |                             | 0.5000      | 0.001      |
|                               | CIN3+          | 1.02 (0.99–1.05)            |                             | 1.000       | 0.0019     |
|                               | ≤ CIN1         |                             | 0.99 (0.98–1.00)            | 0.0325      | 0.0123     |
| <b>Alinity m vs. cobas</b>    |                |                             |                             |             |            |
| Total study population        | CIN2+          | 1.02 (1.00–1.05)            |                             | 0.2500      | < 0.0001   |
|                               | CIN3+          | 1.03 (0.99–1.06)            |                             | 0.5000      | 0.0004     |
|                               | ≤ CIN1         |                             | 1.00 (0.99–1.01)            | 0.3359      | 0.0024     |
| Women ≥ 30 years              | CIN2+          | 1.02 (0.99–1.05)            |                             | 0.5000      | 0.0004     |
|                               | CIN3+          | 1.02 (0.99–1.05)            |                             | 1.000       | 0.0019     |
|                               | ≤ CIN1         |                             | 1.00 (0.99–1.01)            | 0.4913      | 0.0019     |

<sup>a</sup>  $p_{McN}$  =  $p$  value for McNemar's test; <sup>b</sup>  $p_{Ni}$  =  $p$  value for the non-inferiority test

**TABLE S2** Paired test results of Alinity m high risk HPV for a) diseased cases (CIN2+) and b) non- diseased ( $\leq$  CIN1) cases in total study population with HC2, RealTime and cobas4800.

| Diseased cases (CIN2+) in total study population |                |             |       |            |
|--------------------------------------------------|----------------|-------------|-------|------------|
| Index Test                                       | Reference Test |             | Total | $P_{Ni}^a$ |
|                                                  | HC2 +          | HC2 -       |       |            |
| Alinity m+                                       | 120            | 4           | 124   |            |
| Alinity m -                                      | 1              | 1           | 2     |            |
|                                                  | 121            | 5           | 126   | < 0.0001   |
|                                                  | RealTime+      | RealTime-   |       |            |
| Alinity m+                                       | 122            | 2           | 124   |            |
| Alinity m -                                      | 0              | 2           | 2     |            |
|                                                  | 122            | 4           | 126   | < 0.0001   |
|                                                  | cobas 4800+    | cobas 4800- |       |            |
| Alinity m+                                       | 121            | 3           | 124   |            |
| Alinity m -                                      | 0              | 2           | 2     |            |
|                                                  | 121            | 5           | 126   | < 0.0001   |

  

| Non-diseased cases ( $\leq$ CIN1) in total study population |                |             |       |            |
|-------------------------------------------------------------|----------------|-------------|-------|------------|
| Index Test                                                  | Reference Test |             | Total | $P_{Ni}^a$ |
|                                                             | HC2 +          | HC2 -       |       |            |
| Alinity m +                                                 | 94             | 14          | 108   |            |
| Alinity m -                                                 | 26             | 1078        | 1104  |            |
|                                                             | 120            | 1092        | 1212  | < 0.0001   |
|                                                             | RealTime+      | RealTime-   |       |            |
| Alinity m+                                                  | 94             | 14          | 108   |            |
| Alinity m -                                                 | 6              | 1098        | 1104  |            |
|                                                             | 100            | 1112        | 1212  | 0.005      |
|                                                             | cobas 4800+    | cobas 4800- |       |            |
| Alinity m +                                                 | 92             | 16          | 108   |            |
| Alinity m -                                                 | 11             | 1084        | 1095  |            |
|                                                             | 103            | 1100        | 1203  | 0.0024     |

<sup>a</sup>  $p_{Ni}$  =  $p$  value for the non-inferiority test

**TABLE S3** Overall hrHPV and type-specific concordance between a) Alinity and RealTime; b) Alinity and cobas stratified by the screening and enriched population.

| <b>a) Alinity vs. RealTime</b> |                               |       |                         |       |                         |       |                         |       |
|--------------------------------|-------------------------------|-------|-------------------------|-------|-------------------------|-------|-------------------------|-------|
|                                | <b>Total study population</b> |       |                         |       | <b>Screening</b>        |       | <b>Enrichment</b>       |       |
|                                | <b>All ages</b>               |       | <b>Women ≥ 30 years</b> |       | <b>Women ≥ 30 years</b> |       | <b>Women ≥ 30 years</b> |       |
| <b>HPV types</b>               | Agreement                     | Kappa | Agreement               | Kappa | Agreement               | Kappa | Agreement               | Kappa |
| 14 hr types                    | 97.9%                         | 0.938 | 98.2%                   | 0.939 | 98.5%                   | 0.902 | 96.3%                   | 0.917 |
| HPV-16                         | 99.8%                         | 0.986 | 99.9%                   | 0.987 | 99.8%                   | 0.946 | 100.0%                  | 1.000 |
| HPV-18                         | 99.7%                         | 0.922 | 99.6%                   | 0.876 | 99.7%                   | 0.822 | 99.3%                   | 0.949 |
| HPV-16/18                      | 99.6%                         | 0.973 | 99.5%                   | 0.967 | 99.5%                   | 0.907 | 99.7%                   | 0.993 |
| <b>b) Alinity vs. cobas</b>    |                               |       |                         |       |                         |       |                         |       |
|                                | <b>Total study population</b> |       |                         |       | <b>Screening</b>        |       | <b>Enrichment</b>       |       |
|                                | <b>All ages</b>               |       | <b>Women ≥ 30 years</b> |       | <b>Women ≥ 30 years</b> |       | <b>Women ≥ 30 years</b> |       |
| <b>HPV types</b>               | Agreement                     | Kappa | Agreement               | Kappa | Agreement               | Kappa | Agreement               | Kappa |
| 14 hr types                    | 97.6%                         | 0.930 | 97.8%                   | 0.927 | 98.0%                   | 0.875 | 97.3%                   | 0.938 |
| HPV-16                         | 99.6%                         | 0.972 | 99.9%                   | 0.987 | 99.1%                   | 0.946 | 100.0%                  | 1.000 |
| HPV-18                         | 99.7%                         | 0.926 | 99.8%                   | 0.929 | 99.8%                   | 0.888 | 99.0%                   | 0.928 |
| HPV-16/18                      | 99.3%                         | 0.958 | 99.6%                   | 0.973 | 99.6%                   | 0.927 | 99.0%                   | 0.978 |

**TABLE S4** Timeline of collection and testing of samples within VALGENT-3.

|                                    | screening population (n<br>= 1,300) | enrichment population (n<br>= 300) |
|------------------------------------|-------------------------------------|------------------------------------|
| Sample collection period (mm/yyyy) | 12/2009 – 9/2010                    | 1/2014 – 6/2015                    |
| Testing period (mm/yyyy)           |                                     |                                    |
| Hybrid Capture 2                   | 12/2009 – 9/2010                    | 1/2014 – 6/2015                    |
| RealTime High Risk HPV             | 12/2009 – 9/2010                    | 1/2014 – 6/2015                    |
| cobas 4800 HPV                     |                                     | 12/2015 – 7/2016                   |
| Alinity m HR HPV                   |                                     | 8/2018 – 9/2018                    |
